# Supplementary material
Source: PubMed Central journal article supplement (PMC5134984)
Supplement: supp_tpc.16.00486_TPC2016-00486-RAR2_Supplemental_figures_and_tables.pdf [file supp_tpc.16.00486_TPC2016-00486-RAR2_Supplemental_figures_and_tables.pdf]

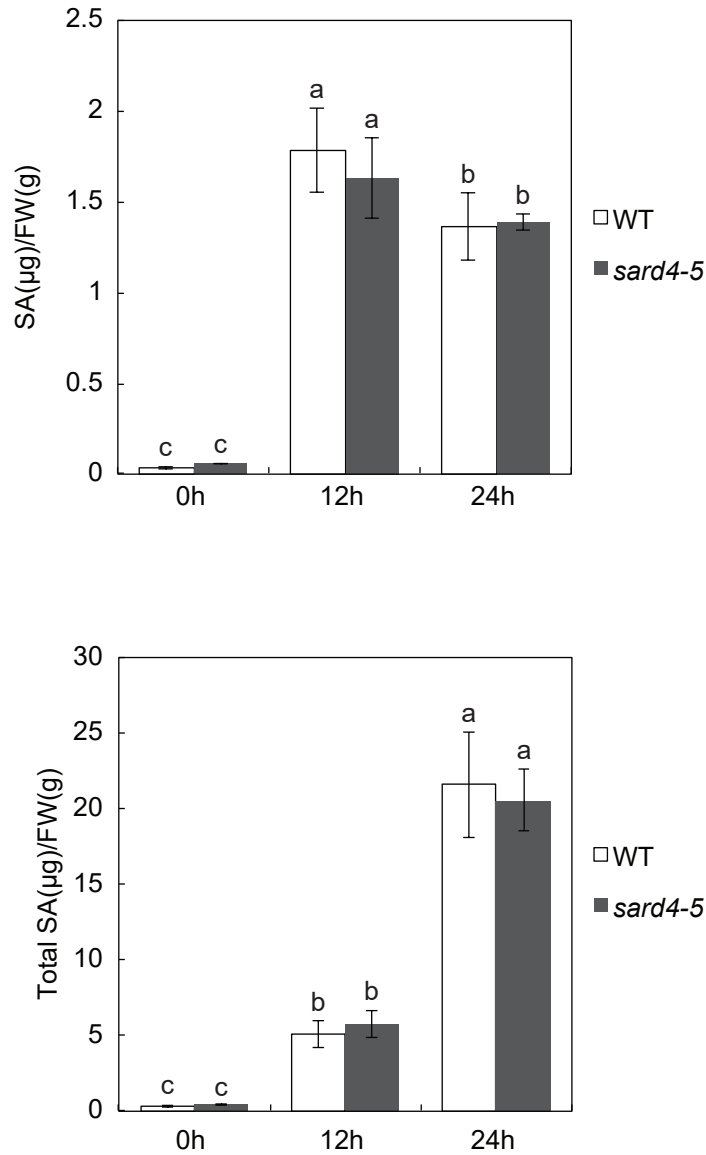

**Supplemental Figure 1. SARD4 is not required for local SA accumulation induced by *P.s.m.* ES4326.** Leaves of four-week-old plants were infiltrated with *P.s.m.* ES4326 ( $OD_{600}=0.005$ ), and the inoculated leaves were collected 12h and 24h later for SA extraction. Free SA and total SA levels were quantified by high-performance liquid chromatography. Statistical differences between the samples are labeled with different letters ( $P < 0.05$ , one-way ANOVA;  $n = 4$ ). The experiment was repeated twice with similar results.

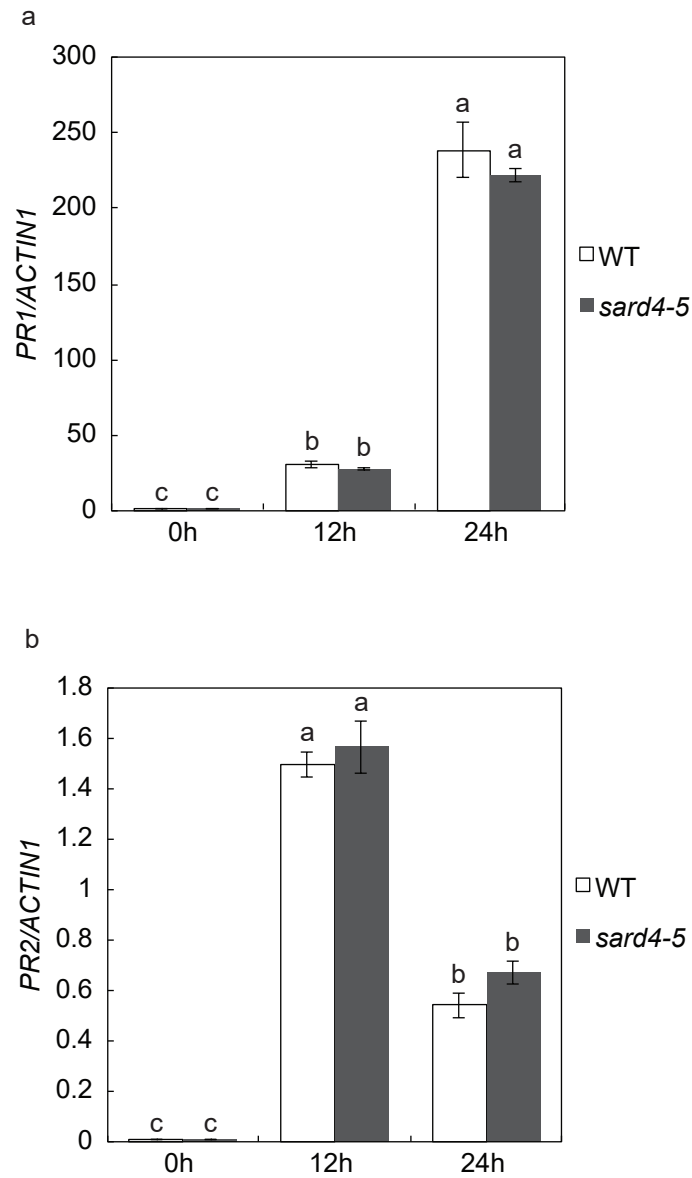

**Supplemental Figure 2. SARD4 is not required for local PR gene expression induced by *P.s.m.* ES4326.** *PR1* (a) and *PR2* (b) expression in WT and *sard4-5* induced by *P.s.m.* ES4326. Three-week-old plants were infiltrated with *P.s.m.* ES4326 ( $OD_{600}=0.005$ ), and the inoculated leaves were collected 12h and 24h later for RT-qPCR analysis. Values were obtained from abundances of *PR1* and *PR2* transcripts normalized against that of *ACTIN1*. Statistical differences among the samples are labeled with different letters ( $P < 0.01$ , one-way ANOVA;  $n = 3$ ). Similar results were obtained in three independent experiments.

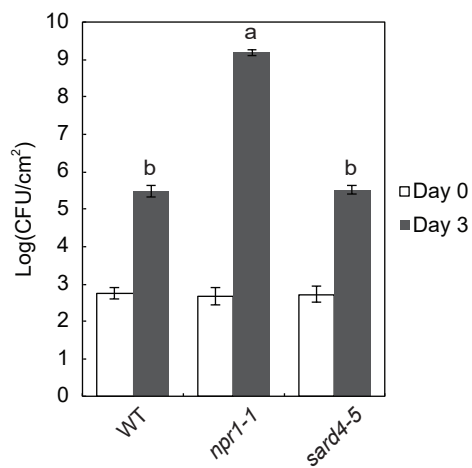

**Supplemental Figure 3. SARD4 is not required for local resistance against *P.s.m.* ES4326.**

Leaves of four-week-old WT, *npr1-1* and *sard4-5* plants were infiltrated with a *P.s.m.* ES4326 ( $OD_{600}=0.0001$ ). Bacterial growth was determined three days post inoculation. cfu, colony forming unit. Statistical differences between the samples are labeled with different letters ( $P < 0.01$ , one-way ANOVA;  $n = 6$ ). The experiment was repeated twice with similar results.

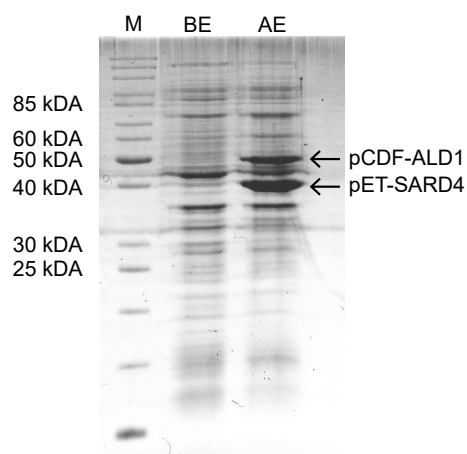

**Supplemental Figure 4. Heterologous expression of pCDF-ALD1 and pET-SARD4 in a single *E.coli* liquid culture for the in-cell activity assay.**

Coomassie brilliant blue-stained SDS-PAGE showing proteins before (BE) and after induction (AE) of protein expression. Proteins of the correct molecular weight (ALD1 in pCDFDuet vector, 51.6 kDa respectively SARD4 in pET24, 38.0 kDa) are marked with black arrows.

Similar results were obtained in two independent experiments.

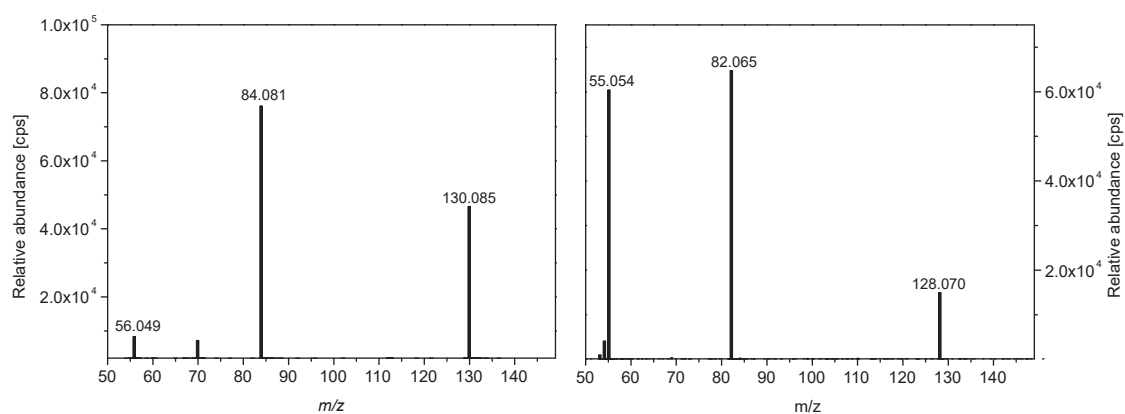

**Supplemental Figure 5. MS/MS fragmentation patterns of Pip and P2C from in-cell assay.**

MS/MS fragmentation pattern of (a) Pip and (b) P2C detected in the *E. coli* cultures expressing only ALD1 (a), and ALD1 and SARD4 together (b), respectively. The fragmentation of Pip (a) and P2C (b) leads to a loss of the carboxyl group ( $m/z$  84.081 and  $m/z$  82.065 respectively). In Pip, the mass signal of  $m/z$  56.049 represents a C<sub>3</sub>H<sub>6</sub>N-fragment. In P2C the C=N double bond stays intact so that the mass signal of  $m/z$  55.054 represents a C<sub>4</sub>H<sub>7</sub>-fragment.

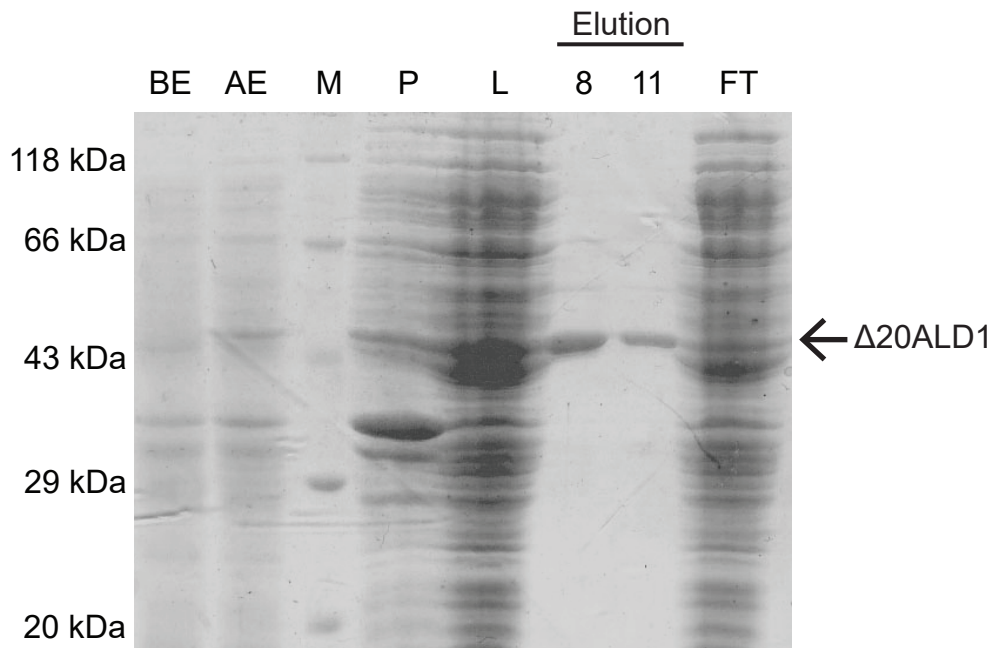

**Supplemental Figure 6. SDS-PAGE analysis of heterologous expressed 6×His-tagged  $\Delta 20$ ALD1 protein (~ 50 kDa) purified by affinity chromatography.**

Coomassie brilliant blue-stained SDS-PAGE gel shows total proteins before (BE) and after induction (AE) of  $\Delta 20$ ALD1 expression in *E. coli* and different fractions from the purification process. Protein bands of the correct molecular weight are marked with a black arrow. M, Molecular marker; P, pellet fraction; L, lysate fraction before purification; FT, collected flow through. The results are representative for three independent experiments.

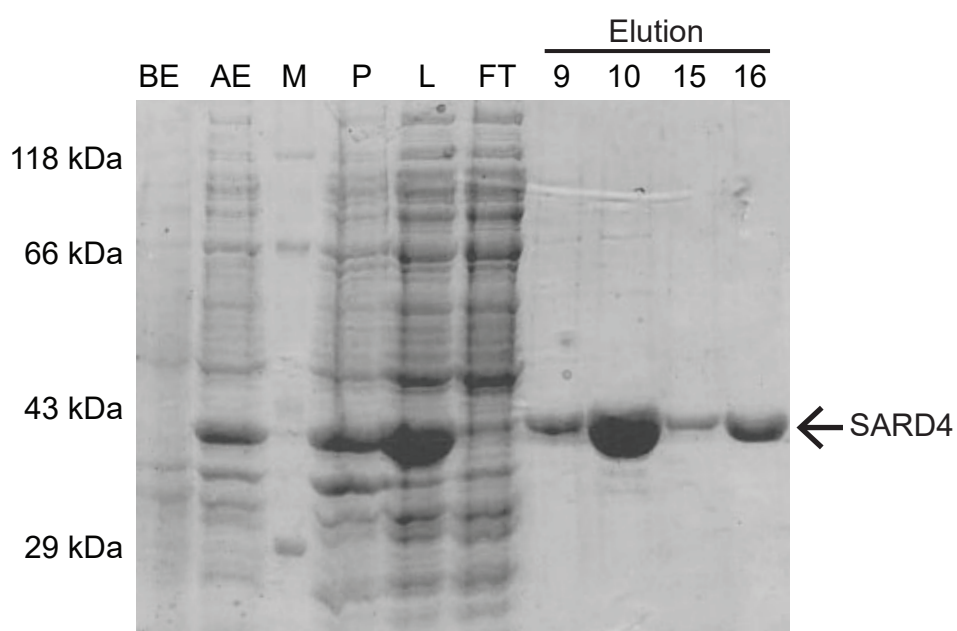

**Supplemental Figure 7. SDS-PAGE analysis of heterologously expressed 6×His-tagged SARD4 protein (~ 36.4 kDa) purified by affinity chromatography.**

Coomassie brilliant blue-stained SDS-PAGE gel shows total proteins before (BE) and after induction (AE) of SARD4 expression in *E.coli* and different fractions from the purification process. Protein bands of the correct molecular weight are marked with a black arrow. M, Molecular marker; P, pellet fraction; L, lysate fraction before purification; FT, collected flow through. The results are representative for three independent experiments.

**Supplemental Table 1. Primers used in this study.**

| Primer        | 5'-3' sequence                       | Purpose    |
|---------------|--------------------------------------|------------|
| GABI_428E01-F | tacaccgttcatcaccttc                  | Genotyping |
| GABI_428E01-R | cccacaaatgtcttctctc                  | Genotyping |
| SALK_007673-F | ggtattggtacttacttggag                | Genotyping |
| SALK_007673-R | agaagaaatactctatccggg                | Genotyping |
| RT-SARD4-F    | aaggagatttcattcgatagcc               | RT         |
| RT-SARD4-R    | ctgaggtaagtctcgtgaac                 | RT         |
| K19E20-F      | gacaagaaccacatgagagc                 | Mapping    |
| K19E20-R      | gttatgtgtacacttcaggtc                | Mapping    |
| MMN10-F       | agctgcaataatgccaagg                  | Mapping    |
| MMN10-R       | gaaccatcaccactggtgag                 | Mapping    |
| MYN8-F        | agtcgtcatgctcatgaacc                 | Mapping    |
| MYN8-R        | ttcacaagggattaagaacc                 | Mapping    |
| K10D11-F      | ctgattcagcacaggtaaca                 | Mapping    |
| K10D11-R      | tctacccaaacggctcacca                 | Mapping    |
| ALD1-F1       | acggaattcatggctcagtctaattgttcttagttc | cloning    |
| ALD1-R1       | acgctcgagattggtattagaagtggaagagag    | cloning    |
| SARD4-F       | cggaattcatggctgcattaccagtatt         | cloning    |
| SARD4-R       | acgctcgagacaacggctgaggtaagtct        | cloning    |
| ALD1-F2       | acgggatccatgccaaggctagtttgacttc      | cloning    |
| ALD1-R2       | acgaagcttctaattggtattagaagtggaag     | cloning    |



**Supplemental ANOVA tables****ANOVA for Figure 1B**

|           | df | SS       | MS      | F-value | P-value  |
|-----------|----|----------|---------|---------|----------|
| genotype  | 3  | 157.7734 | 52.5911 | 34.903  | 3.31E-06 |
| residuals | 12 | 18.0813  | 1.5068  |         |          |

**ANOVA for Figure 1C**

|           | df | SS     | MS     | F-value  | P-value  |
|-----------|----|--------|--------|----------|----------|
| genotype  | 3  | 7.2596 | 2.4199 | 130.1571 | 3.97E-07 |
| residuals | 8  | 0.1487 | 0.0186 |          |          |

**ANOVA for Figure 1D**

|           | df | SS     | MS     | F-value | P-value  |
|-----------|----|--------|--------|---------|----------|
| genotype  | 3  | 0.0225 | 0.0075 | 94.7537 | 1.37E-06 |
| residuals | 8  | 0.0006 | 0.0001 |         |          |

**ANOVA for Figure 2B**

|           | df | SS | MS | F-value  | P-value  |
|-----------|----|----|----|----------|----------|
| time      | 1  | 0  | 0  | 2,550.11 | 9.20E-07 |
| residuals | 4  | 0  | 0  |          |          |

**ANOVA for Figure 2C**

|           | df | SS       | MS       | F-value | P-value  |
|-----------|----|----------|----------|---------|----------|
| genotype  | 2  | 574.9904 | 287.4952 | 33.7775 | 6.55E-05 |
| residuals | 9  | 76.6029  | 8.5114   |         |          |

**Tukey's unequal N HSD groups for Figure 1B**

| genotype               | mean   | group |
|------------------------|--------|-------|
| WT                     | 9.0202 | a     |
| <i>sard4-4 FMO1-3D</i> | 4.5914 | b     |
| <i>sard4-3 FMO1-3D</i> | 3.8046 | b     |
| <i>FMO1-3D</i>         | 0.1921 | c     |

**Tukey's unequal N HSD groups for Figure 1C**

| genotype               | mean  | group |
|------------------------|-------|-------|
| <i>FMO1-3D</i>         | 1.822 | a     |
| <i>sard4-3 FMO1-3D</i> | 0.048 | b     |
| <i>sard4-4 FMO1-3D</i> | 0.029 | b     |
| WT                     | 0.002 | b     |

**Tukey's unequal N HSD groups for Figure 1D**

| genotype               | mean  | group |
|------------------------|-------|-------|
| <i>FMO1-3D</i>         | 0.104 | a     |
| <i>sard4-3 FMO1-3D</i> | 0.011 | b     |
| <i>sard4-4 FMO1-3D</i> | 0.002 | b     |
| WT                     | 0.001 | b     |

**Tukey's unequal N HSD groups for Figure 2B**

| time | mean   | group |
|------|--------|-------|
| 24h  | 0.0019 | a     |
| 0h   | 0      | b     |

**Tukey's unequal N HSD groups for Figure 2C**

| treatment              | mean    | group |
|------------------------|---------|-------|
| WT                     | 16.5376 | a     |
| <i>sard4-5 FMO1-3D</i> | 13.631  | a     |
| <i>FMO1-3D</i>         | 0.6176  | b     |

**ANOVA for Figure 3A, Free SA**

|                      | df | SS     | MS     | F-value | P-value  |
|----------------------|----|--------|--------|---------|----------|
| genotype             | 1  | 0.0008 | 0.0008 | 6.3293  | 0.0247   |
| treatment            | 1  | 0.0011 | 0.0011 | 10.9858 | 0.0051   |
| genotype × treatment | 3  | 0.002  | 0.0007 | 23.3953 | 2.66E-05 |
| residuals            | 12 | 0      | 0      |         |          |

**Tukey's HSD groups for Figure 3A, Free SA**

| genotype × treatment  | mean  | group |
|-----------------------|-------|-------|
| WT <i>P.s.m.</i>      | 0.062 | a     |
| <i>sard4-5 P.s.m.</i> | 0.04  | b     |
| WT mock               | 0.037 | b     |
| <i>sard4-5</i> mock   | 0.031 | b     |

**ANOVA for Figure 3A, Total SA**

|                      | df | SS     | MS     | F-value | P-value  |
|----------------------|----|--------|--------|---------|----------|
| genotype             | 1  | 0.6799 | 0.6799 | 8.735   | 0.0104   |
| treatment            | 1  | 0.676  | 0.676  | 8.6532  | 0.0107   |
| genotype × treatment | 3  | 1.7485 | 0.5828 | 331.403 | 8.39E-12 |
| residuals            | 12 | 0.0211 | 0.0018 |         |          |

**Tukey's HSD groups for Figure 3A, Total SA**

| genotype × treatment  | mean   | group |
|-----------------------|--------|-------|
| WT <i>P.s.m.</i>      | 1.6071 | a     |
| WT mock               | 0.8827 | b     |
| <i>sard4-5 P.s.m.</i> | 0.8815 | b     |
| <i>sard4-5</i> mock   | 0.7837 | b     |

**ANOVA for Figure 3B**

|                      | df | SS      | MS      | F-value  | P-value  |
|----------------------|----|---------|---------|----------|----------|
| genotype             | 1  | 6.8665  | 6.8665  | 1.5402   | 0.2429   |
| treatment            | 1  | 37.7423 | 37.7423 | 27.5373  | 0.0004   |
| genotype × treatment | 3  | 51.2747 | 17.0916 | 788.0954 | 3.18E-10 |
| residuals            | 8  | 0.1735  | 0.0217  |          |          |

**Tukey's HSD groups for Figure 3B**

| genotype × treatment  | mean   | group |
|-----------------------|--------|-------|
| WT <i>P.s.m.</i>      | 5.132  | a     |
| <i>sard4-5 P.s.m.</i> | 2.1285 | b     |
| WT mock               | 0.0944 | c     |
| <i>sard4-5</i> mock   | 0.0721 | c     |

**ANOVA for Figure 3C**

|                      | df | SS     | MS     | F-value  | P-value  |
|----------------------|----|--------|--------|----------|----------|
| genotype             | 1  | 1.0208 | 1.0208 | 1.5988   | 0.2347   |
| treatment            | 1  | 5.4675 | 5.4675 | 28.2096  | 0.0003   |
| genotype × treatment | 3  | 7.3849 | 2.4616 | 946.7778 | 1.53E-10 |
| residuals            | 8  | 0.0208 | 0.0026 |          |          |

**Tukey's HSD groups for Figure 3C**

| genotype × treatment  | mean   | group |
|-----------------------|--------|-------|
| WT <i>P.s.m.</i>      | 1.9667 | a     |
| <i>sard4-5 P.s.m.</i> | 0.8367 | b     |
| WT mock               | 0.07   | c     |
| <i>sard4-5</i> mock   | 0.0333 | c     |

**ANOVA for Figure 3D**

|                      | df | SS     | MS     | F-value  | P-value  |
|----------------------|----|--------|--------|----------|----------|
| genotype             | 2  | 2.8929 | 1.4464 | 13.9718  | 4.02E-05 |
| treatment            | 1  | 1.5422 | 1.5422 | 10.9998  | 0.0022   |
| genotype × treatment | 5  | 6.2011 | 1.2402 | 344.0076 | 1.11E-16 |
| residuals            | 30 | 0.1082 | 0.0036 |          |          |

**Tukey's HSD groups for Figure 3D**

| genotype × treatment  | mean        | group |
|-----------------------|-------------|-------|
| <i>fmo1 P.s.m.</i>    | 6.290538667 | a     |
| <i>fmo1</i> mock      | 6.278133167 | a     |
| <i>sard4-5</i> mock   | 6.111863833 | b     |
| WT mock               | 6.1055395   | b     |
| <i>sard4-5 P.s.m.</i> | 5.882202167 | c     |
| WT <i>P.s.m.</i>      | 5.0809245   | d     |

**ANOVA for Figure 4A**

|                      | df | SS           | MS         | F-value  | P-value  |
|----------------------|----|--------------|------------|----------|----------|
| genotype             | 2  | 775,790.78   | 387,895.39 | 14.5588  | 2.93E-05 |
| treatment            | 1  | 315,940.38   | 315,940.38 | 8.0219   | 0.0077   |
| genotype × treatment | 5  | 1,578,159.64 | 315,631.93 | 123.1973 | 1.11E-16 |
| residuals            | 30 | 76,860.13    | 2,562.00   |          |          |

**Tukey's HSD groups for Figure 4A**

| genotype × treatment  | mean        | group |
|-----------------------|-------------|-------|
| WT <i>P.s.m.</i>      | 620.6161583 | a     |
| WT mock               | 104.806915  | b     |
| <i>sard4-5 P.s.m.</i> | 74.979      | b     |
| <i>ald1 P.s.m.</i>    | 51.0686     | b     |
| <i>ald1</i> mock      | 40.70441667 | b     |
| <i>sard4-5</i> mock   | 39.06668333 | b     |

**ANOVA for Figure 4B**

|                      | df | SS        | MS       | F-value  | P-value  |
|----------------------|----|-----------|----------|----------|----------|
| genotype             | 2  | 11,752.47 | 5,876.24 | 10.6571  | 0.0003   |
| treatment            | 1  | 5,876.24  | 5,876.24 | 8.2997   | 0.0068   |
| genotype × treatment | 5  | 29,381.18 | 5,876.24 | 310.7781 | 1.11E-16 |
| residuals            | 30 | 76,860.13 | 2,562.00 |          |          |

**Tukey's HSD groups for Figure 4B**

| genotype × treatment  | mean        | group |
|-----------------------|-------------|-------|
| <i>sard4-5 P.s.m.</i> | 76.65661667 | a     |
| <i>sard4-5</i> mock   | 0           | b     |
| WT mock               | 0           | b     |
| WT <i>P.s.m.</i>      | 0           | b     |
| <i>ald1</i> mock      | 0           | b     |
| <i>ald1 P.s.m.</i>    | 0           | b     |

**ANOVA for Figure 5A**

|                      | df | SS     | MS     | F-value  | P-value  |
|----------------------|----|--------|--------|----------|----------|
| genotype             | 3  | 0.3484 | 0.1161 | 3.7703   | 0.027    |
| treatment            | 1  | 0.26   | 0.26   | 7.9508   | 1.00E-02 |
| genotype × treatment | 7  | 0.82   | 0.12   | 119.3415 | 1.32E-12 |
| residuals            | 16 | 0.0157 | 0.001  |          |          |

**Tukey's HSD groups for Figure 5A**

| genotype × treatment  | mean   | group |
|-----------------------|--------|-------|
| WT <i>P.s.m.</i>      | 0.5886 | a     |
| <i>fmo1 P.s.m.</i>    | 0.2376 | b     |
| WT mock               | 0      | c     |
| <i>sard4-5</i> mock   | 0      | c     |
| <i>fmo1</i> mock      | 0      | c     |
| <i>ald1</i> mock      | 0      | c     |
| <i>sard4-5 P.s.m.</i> | 0      | c     |
| <i>ald1 P.s.m.</i>    | 0      | c     |

**ANOVA for Figure 5B**

|                      | df | SS       | MS       | F-value | P-value  |
|----------------------|----|----------|----------|---------|----------|
| genotype             | 3  | 809.6088 | 269.8696 | 2.0668  | 0.1368   |
| treatment            | 1  | 1,729.02 | 1,729.02 | 22.4808 | 9.87E-05 |
| genotype × treatment | 7  | 3,326.07 | 475.15   | 80.0401 | 2.95E-11 |
| residuals            | 16 | 94.983   | 5.9364   |         |          |

**Tukey's HSD groups for Figure 5B**

| genotype × treatment  | mean    | group |
|-----------------------|---------|-------|
| <i>fmo1 P.s.m.</i>    | 30.2538 | a     |
| WT <i>P.s.m.</i>      | 24.5918 | a     |
| <i>sard4-5 P.s.m.</i> | 13.7923 | b     |
| WT mock               | 0.3667  | c     |
| <i>sard4-5</i> mock   | 0.1743  | c     |
| <i>fmo1</i> mock      | 0.1649  | c     |
| <i>ald1</i> mock      | 0.0352  | c     |
| <i>ald1 P.s.m.</i>    | 0.0055  | c     |

**ANOVA for Figure 9A**

|                      | df | SS     | MS     | F-value | P-value  |
|----------------------|----|--------|--------|---------|----------|
| genotype × treatment | 4  | 39.533 | 9.8832 | 196.37  | 1.86E-09 |
| residuals            | 10 | 0.5033 | 0.0503 |         |          |

**Tukey's unequal N HSD groups for Figure 9A**

| genotype × treatment       | mean        | group |
|----------------------------|-------------|-------|
| <i>FMO1-3D</i>             | 3.34466     | a     |
| <i>sard4-4 FMO1-3D</i> Pip | 3.307500333 | a     |
| <i>sard4-4 FMO1-3D</i>     | 0.028772    | b     |
| WT Pip                     | 0.005109    | b     |
| WT                         | 0.003324333 | b     |

**ANOVA for Figure 9B**

|                      | df | SS     | MS     | F-value | P-value  |
|----------------------|----|--------|--------|---------|----------|
| genotype × treatment | 4  | 0.0375 | 0.0094 | 78.5793 | 1.63E-07 |
| residuals            | 10 | 0.0012 | 0.0001 |         |          |

**Tukey's unequal N HSD groups for Figure 9B**

| genotype × treatment       | mean        | group |
|----------------------------|-------------|-------|
| <i>FMO1-3D</i>             | 0.110937333 | a     |
| <i>sard4-4 FMO1-3D</i> Pip | 0.097814    | a     |
| <i>sard4-4 FMO1-3D</i>     | 0.005183    | b     |
| WT Pip                     | 0.001863667 | b     |
| WT                         | 0.000936    | b     |

**ANOVA for Figure 10A**

|           | df | SS    | MS    | F-value | P-value  |
|-----------|----|-------|-------|---------|----------|
| genotype  | 2  | 3.612 | 1.806 | 514.08  | 1.95E-07 |
| residuals | 6  | 0.021 | 0.004 |         |          |

**Tukey's unequal N HSD groups for Figure 10A**

| genotype            | mean   | group |
|---------------------|--------|-------|
| <i>FMO1-3D</i>      | 1.3517 | a     |
| WT                  | 0.0102 | b     |
| <i>ald1 FMO1-3D</i> | 0.0053 | b     |

**ANOVA for Figure 10B**

|           | df | SS     | MS     | F-value  | P-value  |
|-----------|----|--------|--------|----------|----------|
| genotype  | 2  | 0.0072 | 0.0036 | 164.5865 | 5.74E-06 |
| residuals | 6  | 0.0001 | 0      |          |          |

**Tukey's unequal N HSD groups for Figure 10B**

| genotype            | mean  | group |
|---------------------|-------|-------|
| <i>FMO1-3D</i>      | 0.062 | a     |
| <i>ald1 FMO1-3D</i> | 0.003 | b     |
| WT                  | 0.002 | b     |

**ANOVA for Figure 10C**

|           | df | SS      | MS      | F-value | P-value  |
|-----------|----|---------|---------|---------|----------|
| genotype  | 2  | 43.1293 | 21.5647 | 69.1852 | 3.44E-06 |
| residuals | 9  | 2.8053  | 0.3117  |         |          |

**Tukey's unequal N HSD groups for Figure 10C**

| genotype            | mean   | group |
|---------------------|--------|-------|
| <i>ald1 FMO1-3D</i> | 4.1858 | a     |
| WT                  | 3.8988 | a     |
| <i>FMO1-3D</i>      | 0.0284 | b     |

**ANOVA for Supplemental Figure 1, Free SA**

|                 | df | SS    | MS   | F-value  | P-value  |
|-----------------|----|-------|------|----------|----------|
| genotype        | 1  | 0.01  | 0.01 | 0.0132   | 0.9096   |
| time            | 2  | 12.36 | 6.18 | 278.3339 | 7.77E-16 |
| genotype × time | 5  | 12.41 | 2.48 | 107.0406 | 9.64E-13 |
| residuals       | 18 | 0.42  | 0.02 |          |          |

**Tukey's HSD groups for Supplemental Figure 1, Free SA**

| genotype × treatment | mean        | group |
|----------------------|-------------|-------|
| WT 12h               | 1.790662581 | a     |
| <i>sard4-5</i> 12h   | 1.637603513 | a     |
| WT 24h               | 1.391942233 | b     |
| <i>sard4-5</i> 24h   | 1.368012225 | b     |
| <i>sard4-5</i> 0h    | 0.063219098 | c     |
| WT 0h                | 0.041491404 | c     |

**ANOVA for Supplemental Figure 1, Total SA**

|                 | df | SS       | MS       | F-value  | P-value  |
|-----------------|----|----------|----------|----------|----------|
| genotype        | 1  | 0.04     | 0.04     | 0.0005   | 0.9823   |
| time            | 2  | 1,710.66 | 855.3306 | 348.4211 | 1.11E-16 |
| genotype × time | 5  | 1,714.07 | 342.8144 | 128.177  | 2.01E-13 |
| residuals       | 18 | 48.1417  | 2.6745   |          |          |

**Tukey's HSD groups for Supplemental Figure 1, Free SA**

| genotype × treatment | mean        | group |
|----------------------|-------------|-------|
| WT 24h               | 20.26159737 | a     |
| <i>sard4-5</i> 24h   | 19.21905511 | a     |
| <i>sard4-5</i> 12h   | 4.160337996 | b     |
| WT 12h               | 3.373976411 | b     |
| <i>sard4-5</i> 0h    | 0.383617894 | c     |
| WT 0h                | 0.373710726 | c     |

**ANOVA for Supplemental Figure 2A**

|                 | df | SS         | MS        | F-value  | P-value  |
|-----------------|----|------------|-----------|----------|----------|
| genotype        | 1  | 193.99     | 193.99    | 0.0164   | 0.8997   |
| time            | 2  | 188,471.67 | 94,235.83 | 1,230.96 | 1.11E-16 |
| genotype × time | 5  | 188,903.20 | 37,780.64 | 632.4967 | 4.25E-14 |
| residuals       | 12 | 716.7906   | 59.7326   |          |          |

**Tukey's HSD groups for Supplemental Figure 2A**

| genotype × treatment | mean        | group |
|----------------------|-------------|-------|
| WT 24h               | 238.9839557 | a     |
| <i>sard4-5</i> 24h   | 222.2838741 | a     |
| WT 12h               | 31.78198147 | b     |
| <i>sard4-5</i> 12h   | 28.81623621 | b     |
| WT 0h                | 0.031478838 | c     |
| <i>sard4-5</i> 0h    | 9.78E-05    | c     |

**ANOVA for Supplemental Figure 2B**

|                 | df | SS     | MS     | F-value | P-value  |
|-----------------|----|--------|--------|---------|----------|
| genotype        | 1  | 0.0188 | 0.0188 | 0.0417  | 0.8409   |
| time            | 2  | 7.17   | 3.59   | 813.73  | 5.55E-16 |
| genotype × time | 5  | 7.2042 | 1.4408 | 486.056 | 2.05E-13 |
| residuals       | 12 | 0.0356 | 0.003  |         |          |

**Tukey's HSD groups for Supplemental Figure 2B**

| genotype × treatment | mean        | group |
|----------------------|-------------|-------|
| <i>sard4-5</i> 12h   | 1.571097698 | a     |
| WT 12h               | 1.503378138 | a     |
| <i>sard4-5</i> 24h   | 0.671415652 | b     |
| WT 24h               | 0.545805826 | b     |
| <i>sard4-5</i> 0h    | 0.00239703  | c     |
| WT 0h                | 1.82E-03    | c     |

**ANOVA for Supplemental Figure 3**

|           | df | SS      | MS      | F-value  | P-value  |
|-----------|----|---------|---------|----------|----------|
| genotype  | 2  | 53.7031 | 26.8515 | 1,822.01 | 1.11E-16 |
| residuals | 15 | 0.2211  | 0.0147  |          |          |

**Tukey's unequal N HSD groups for Supplemental Figure 3**

| genotype       | mean   | group |
|----------------|--------|-------|
| <i>npr1-1</i>  | 9.1647 | a     |
| <i>sard4-5</i> | 5.5125 | b     |
| WT             | 5.4888 | b     |
